# Supplementary material for: Synthesis of the aminocyclopentenediol fragment of queuosine by way of the stereoselective addition of an organometallic reagent to a N-t-butanesulfinyl glycosylamine
Source: Royal Society of Chemistry journal article supplement (doi:10.1039/d3ob01713c), 2023-11-28

Supporting Information File

**Synthesis of the Aminocyclopentenediol Fragment of Queuosine  
by way of the Stereoselective Addition of an Organometallic Reagent  
to a N-t-butanesulfinyl Glycosylamine**

Floriane Heis,<sup>a</sup> Estelle Gallienne<sup>a</sup> and Olivier R. Martin<sup>a\*</sup>

*Institute of Organic and Analytical Chemistry,  
UMR 7311, University of Orléans and CNRS  
Rue de Chartres  
45067 Orléans  
France*

Comparison of NMR data of compound **11** with the data reported in 1996 by Ogasawara et al.<sup>1</sup> (\*\*\*) for the same compound obtained by a totally different approach. The agreement is quite remarkable.

| Assignement | $\delta$ (ppm) | J (Hz) | $\delta$ (ppm)**  | J (Hz) |
|-------------|----------------|--------|-------------------|--------|
| H-1         | 5,975 (d)      | 5,7    | 5,98 (d)          | 5,5    |
| H-2         | 5,77 (d)       | 5,7    | 5,765 (m)         | -      |
| H-3         | 4,6 (br. s)    | -      | 4,55 (br. s)      | -      |
| H-5         | 5,225 (d)      | 5,6    | 5,22 (d)          | 5,5    |
| H-4         | 4,49 (d)       | 5,6    | 4,49 (d, 2H) + NH | 5,5    |
| CMe2A       | 1.34 (s, 3H)   | -      | 1.34 (s, 3H)      | -      |
| CMe2B       | 1.41 (s, 3H)   | -      | 1.41 (s, 3H)      | -      |
| Boc-tBu     | 1.46 (s, 9H)   | -      | 1.46 (s, 9H)      | -      |

<sup>1</sup> K. Tanaka and K. Ogasawara, *Synthesis* 1996, 219-222.

## COPIES OF NMR SPECTRA

*<sup>1</sup>H (400 MHz) and <sup>13</sup>C (101 MHz) NMR data for compounds **6**, **7S**, **7R**, **8**, **9**, **10**, **11**, **3** (CDCl<sub>3</sub>, 300 K)*

Compound 6

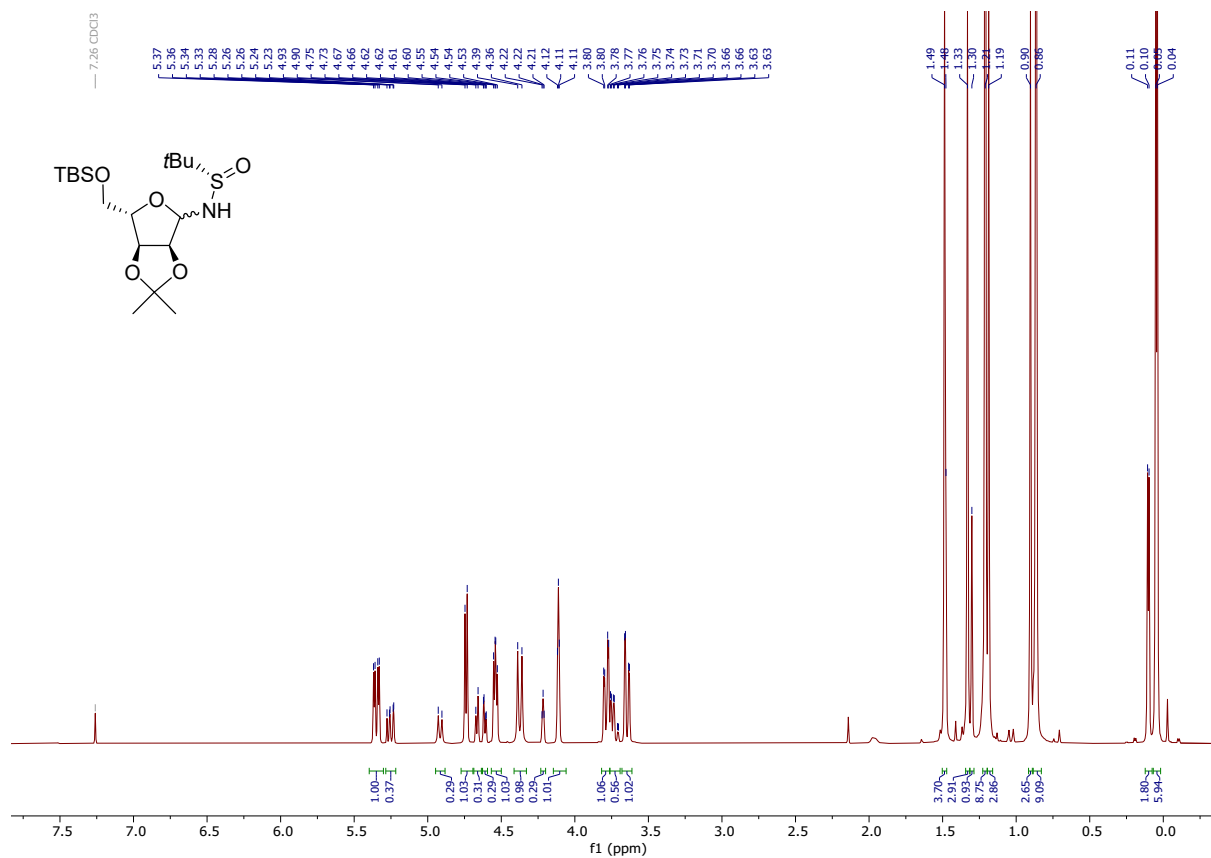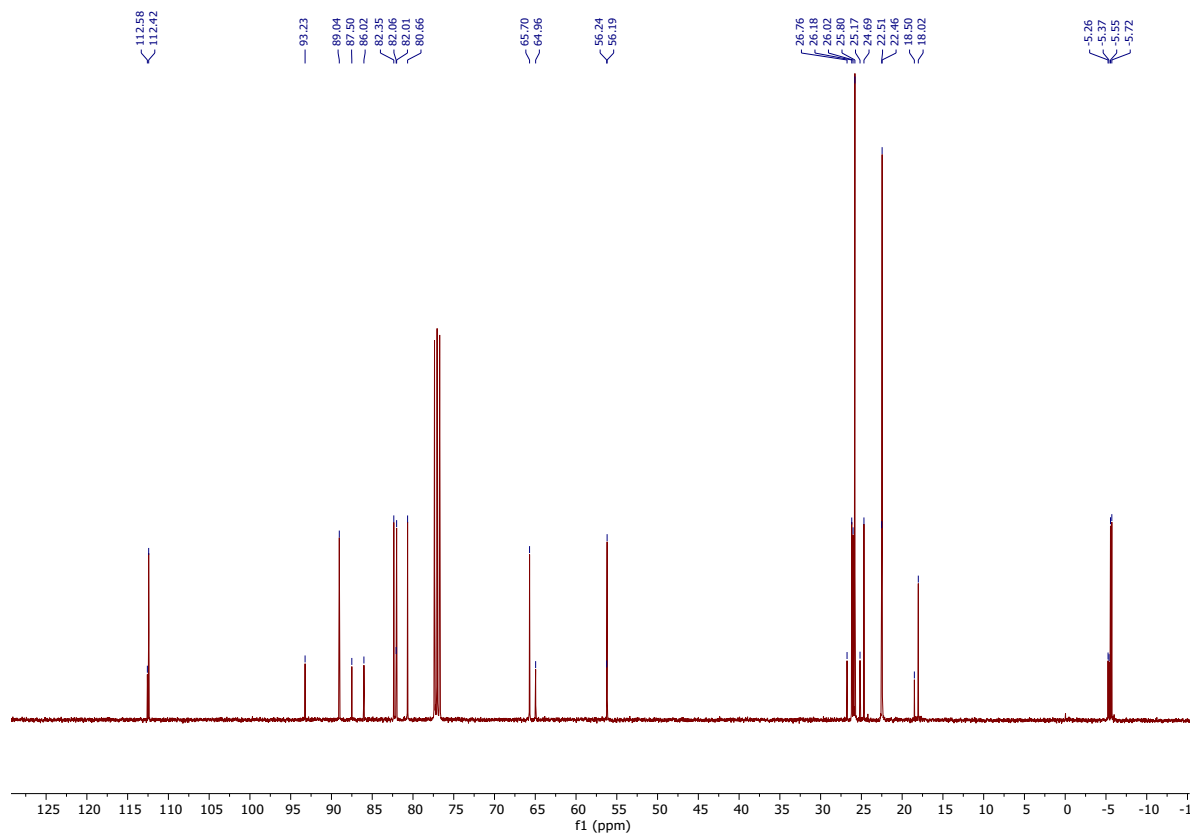

Compound 7S

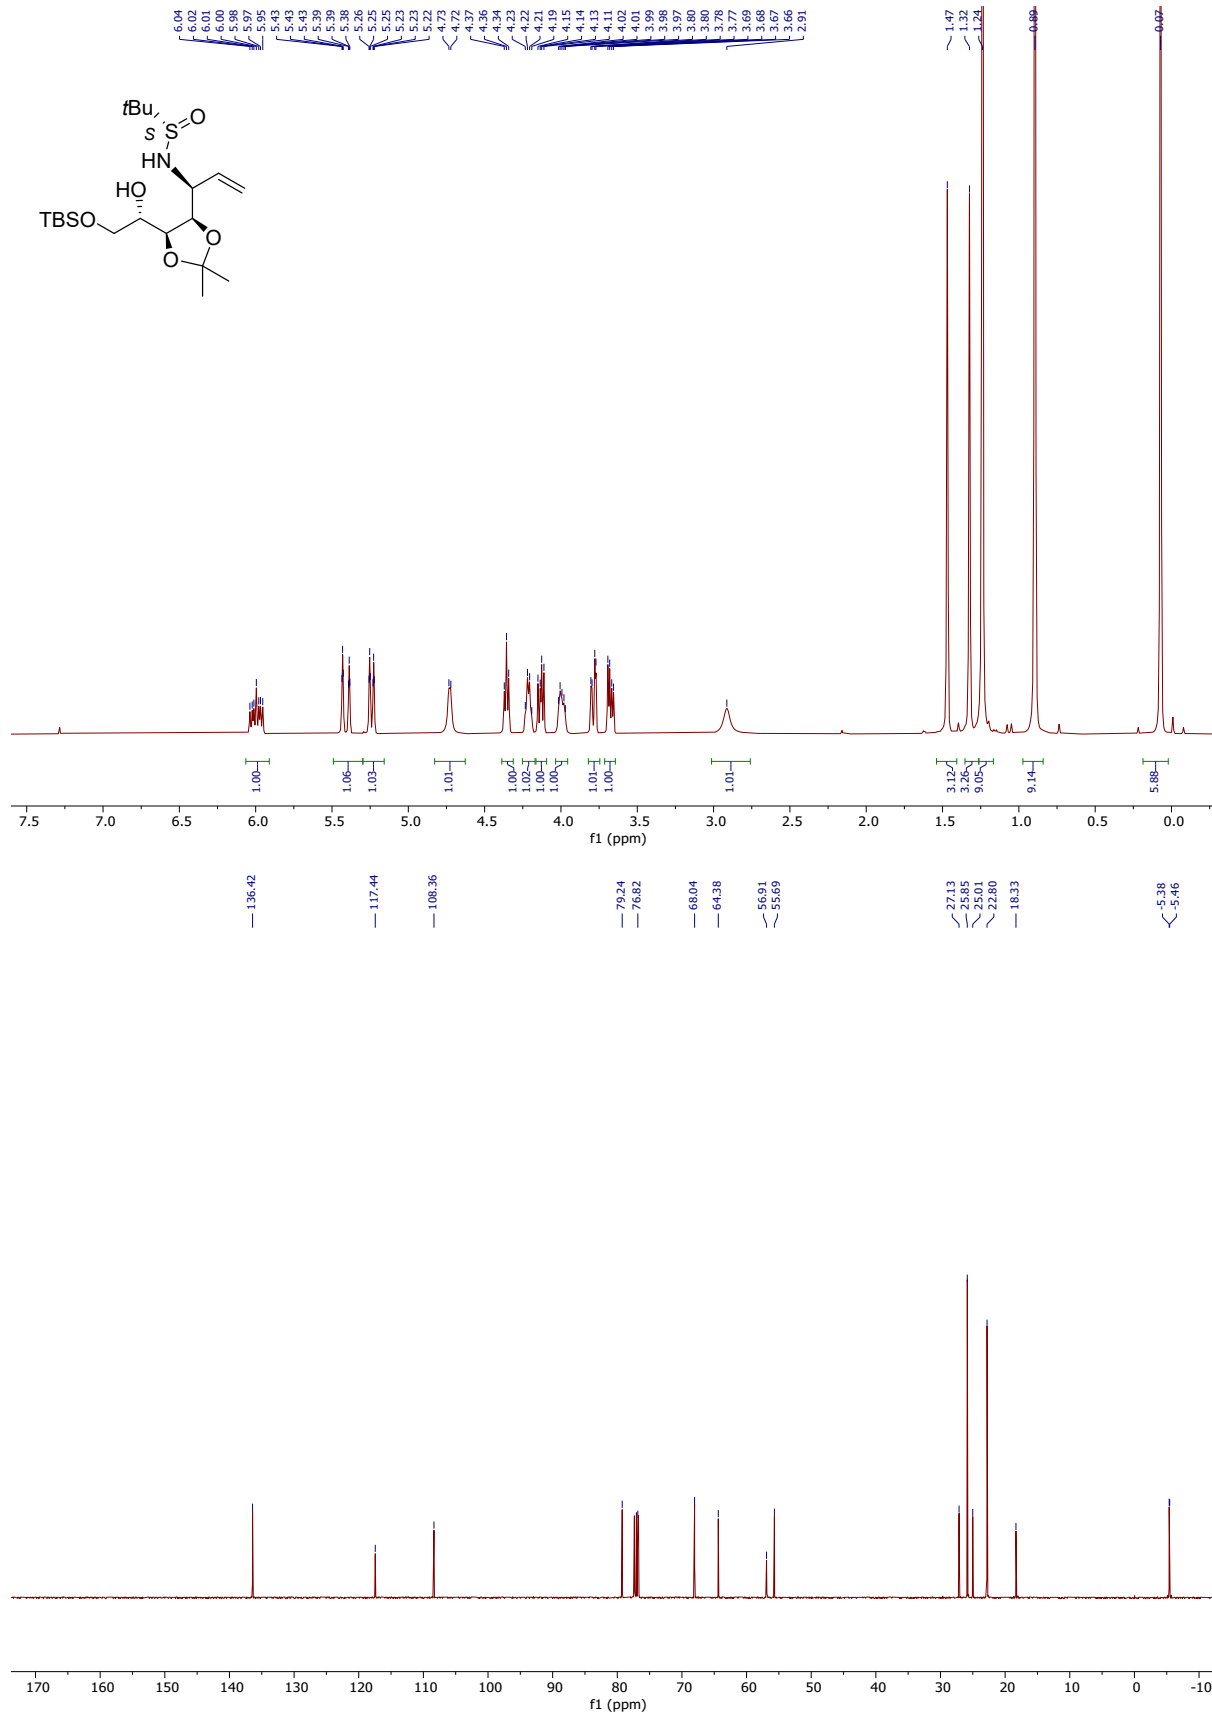

Compound 7R

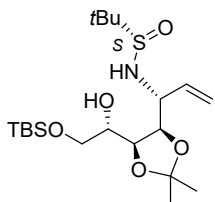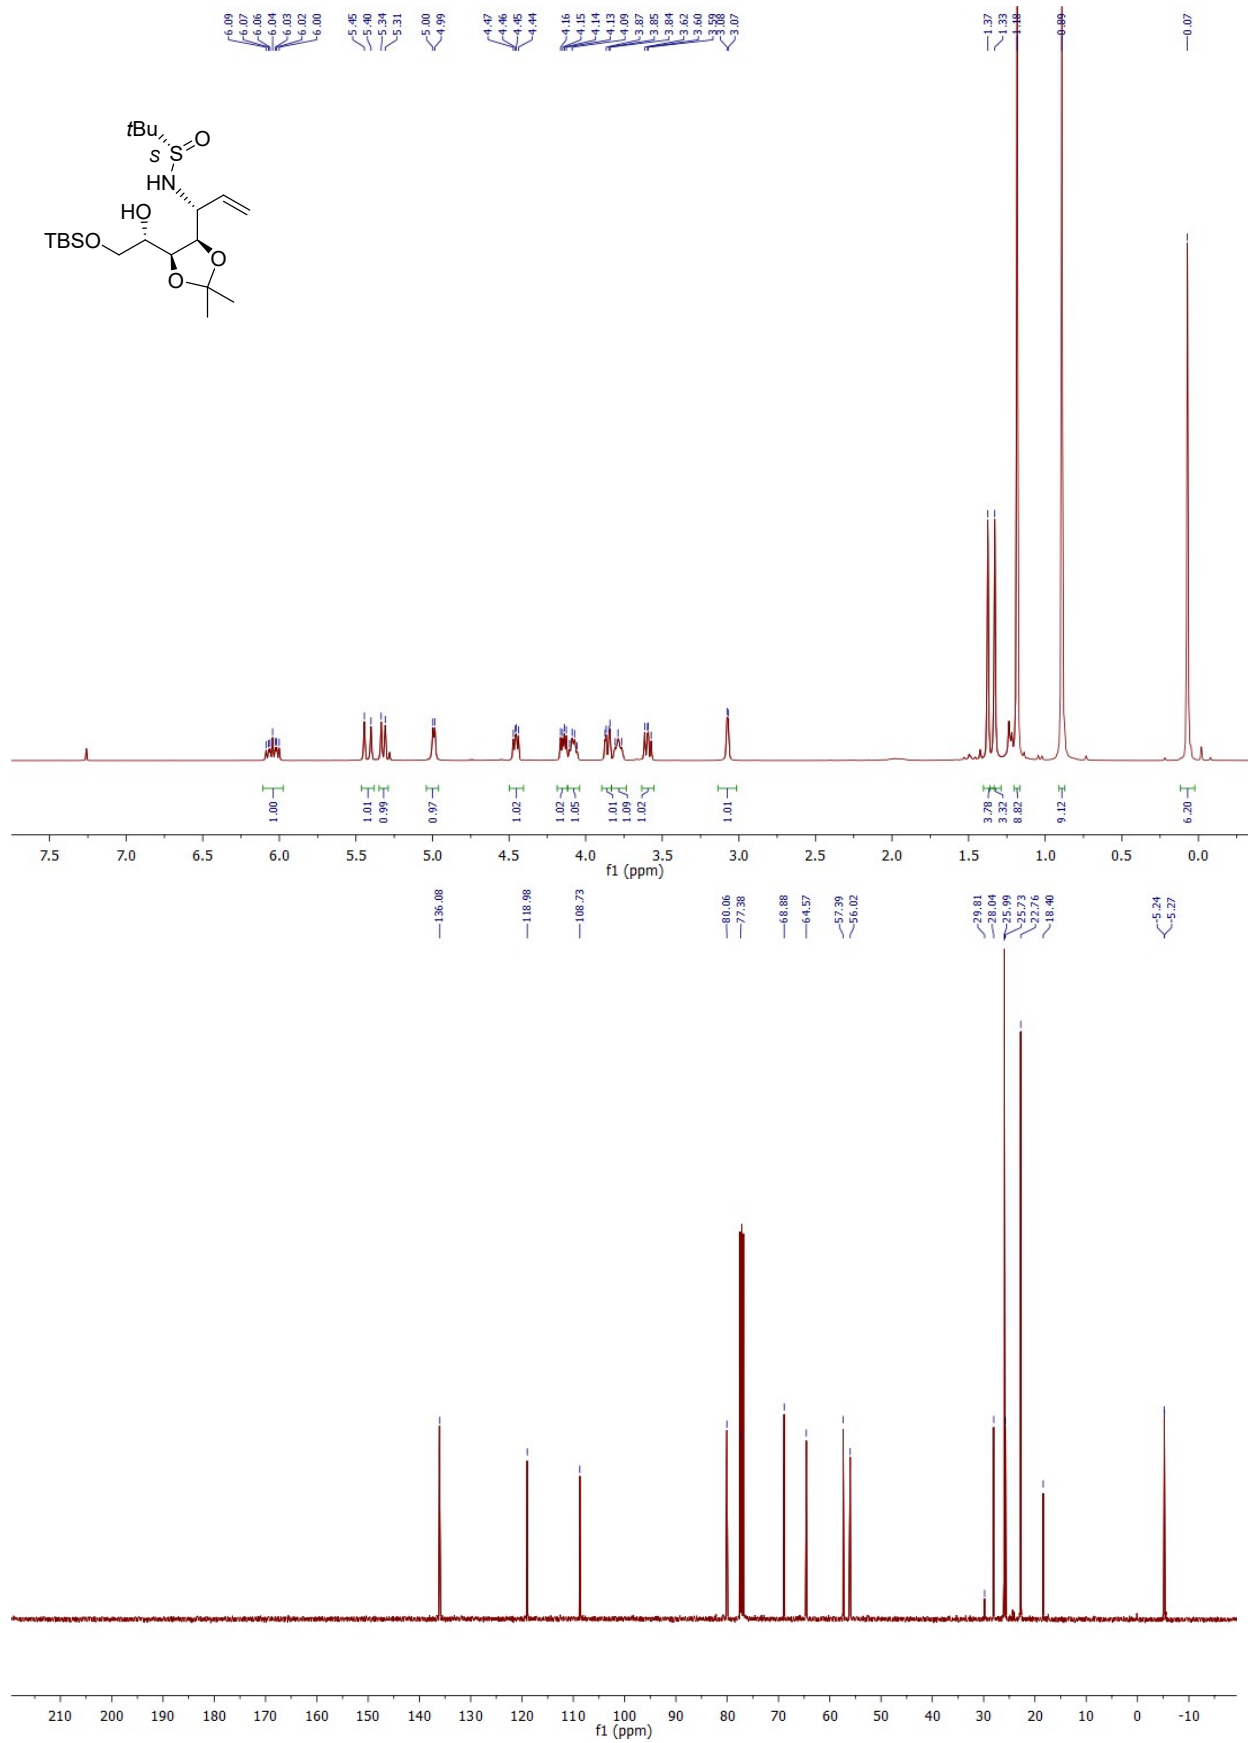

Compound 8

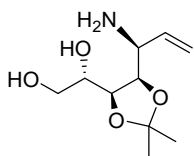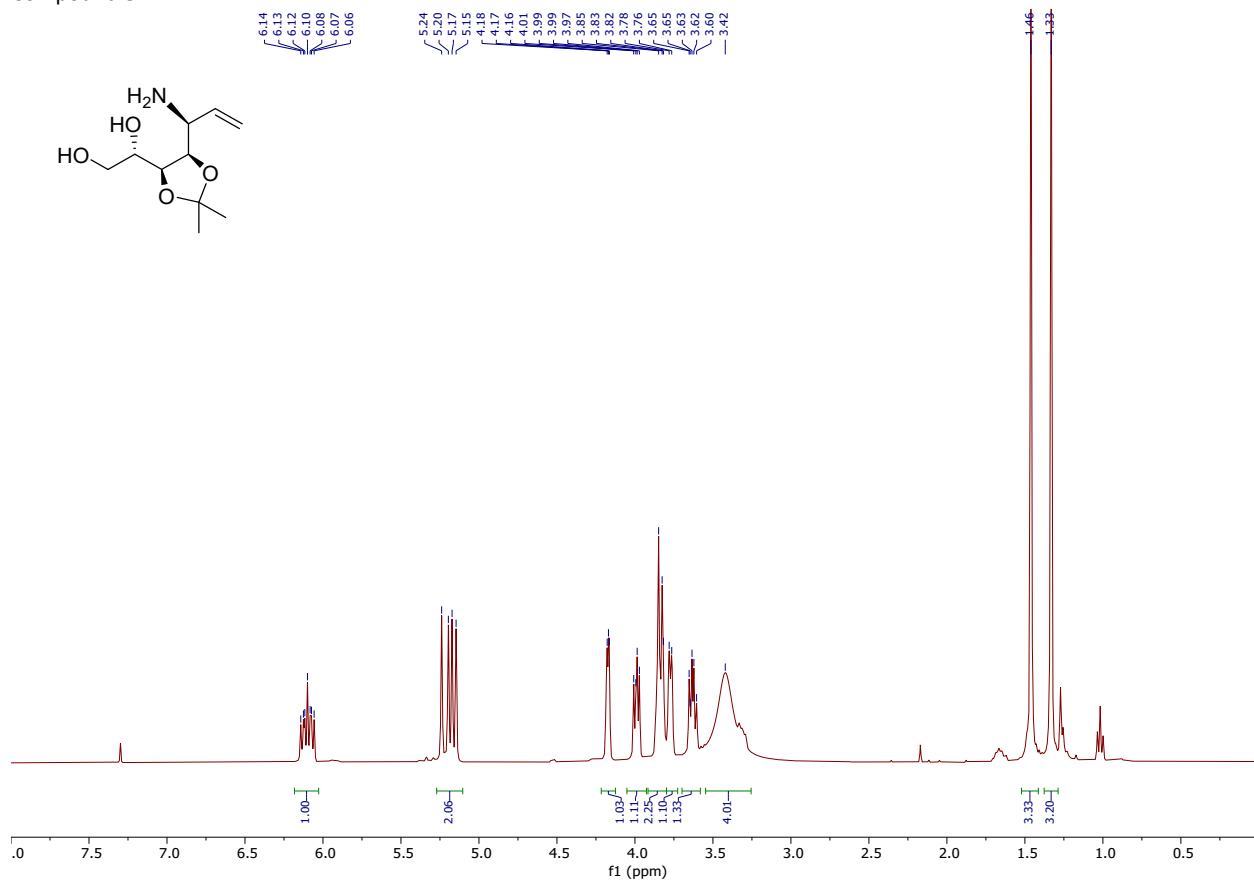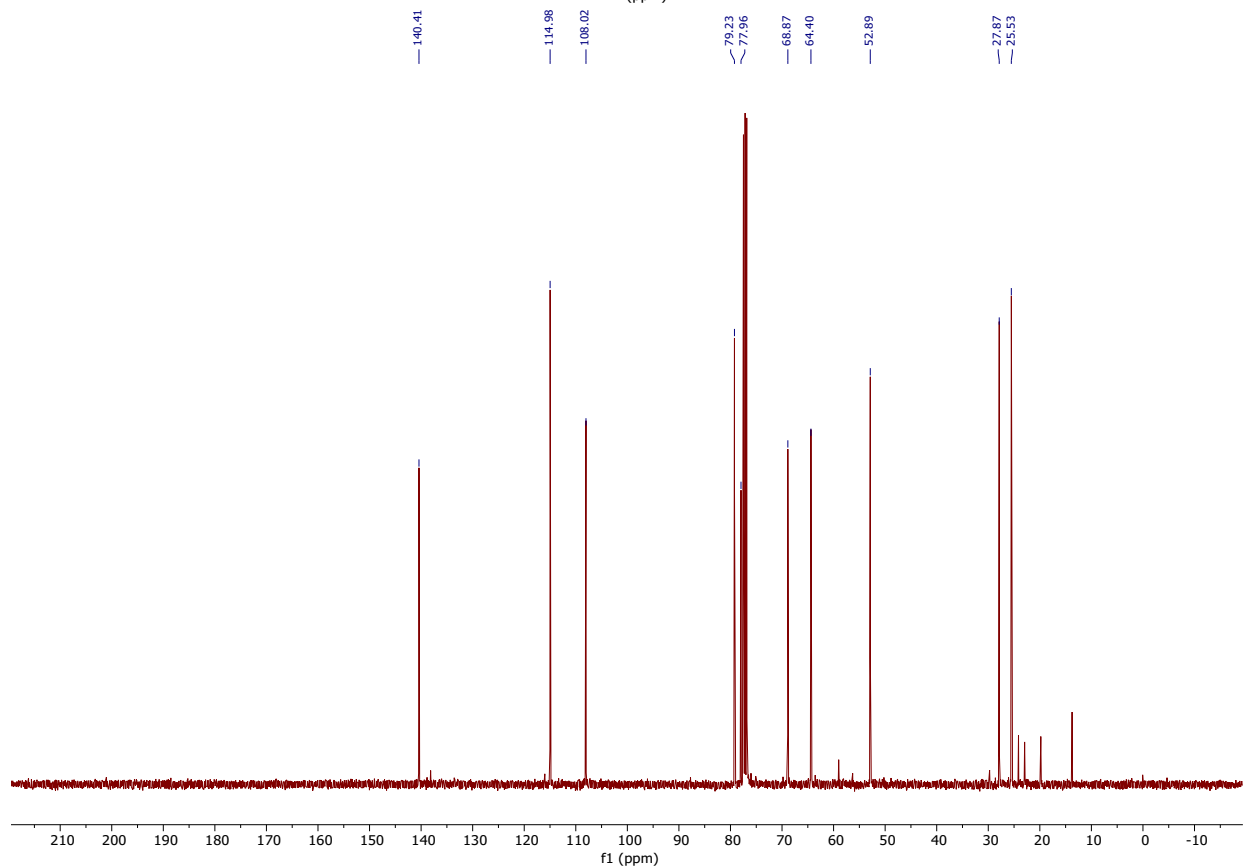

Compound 9

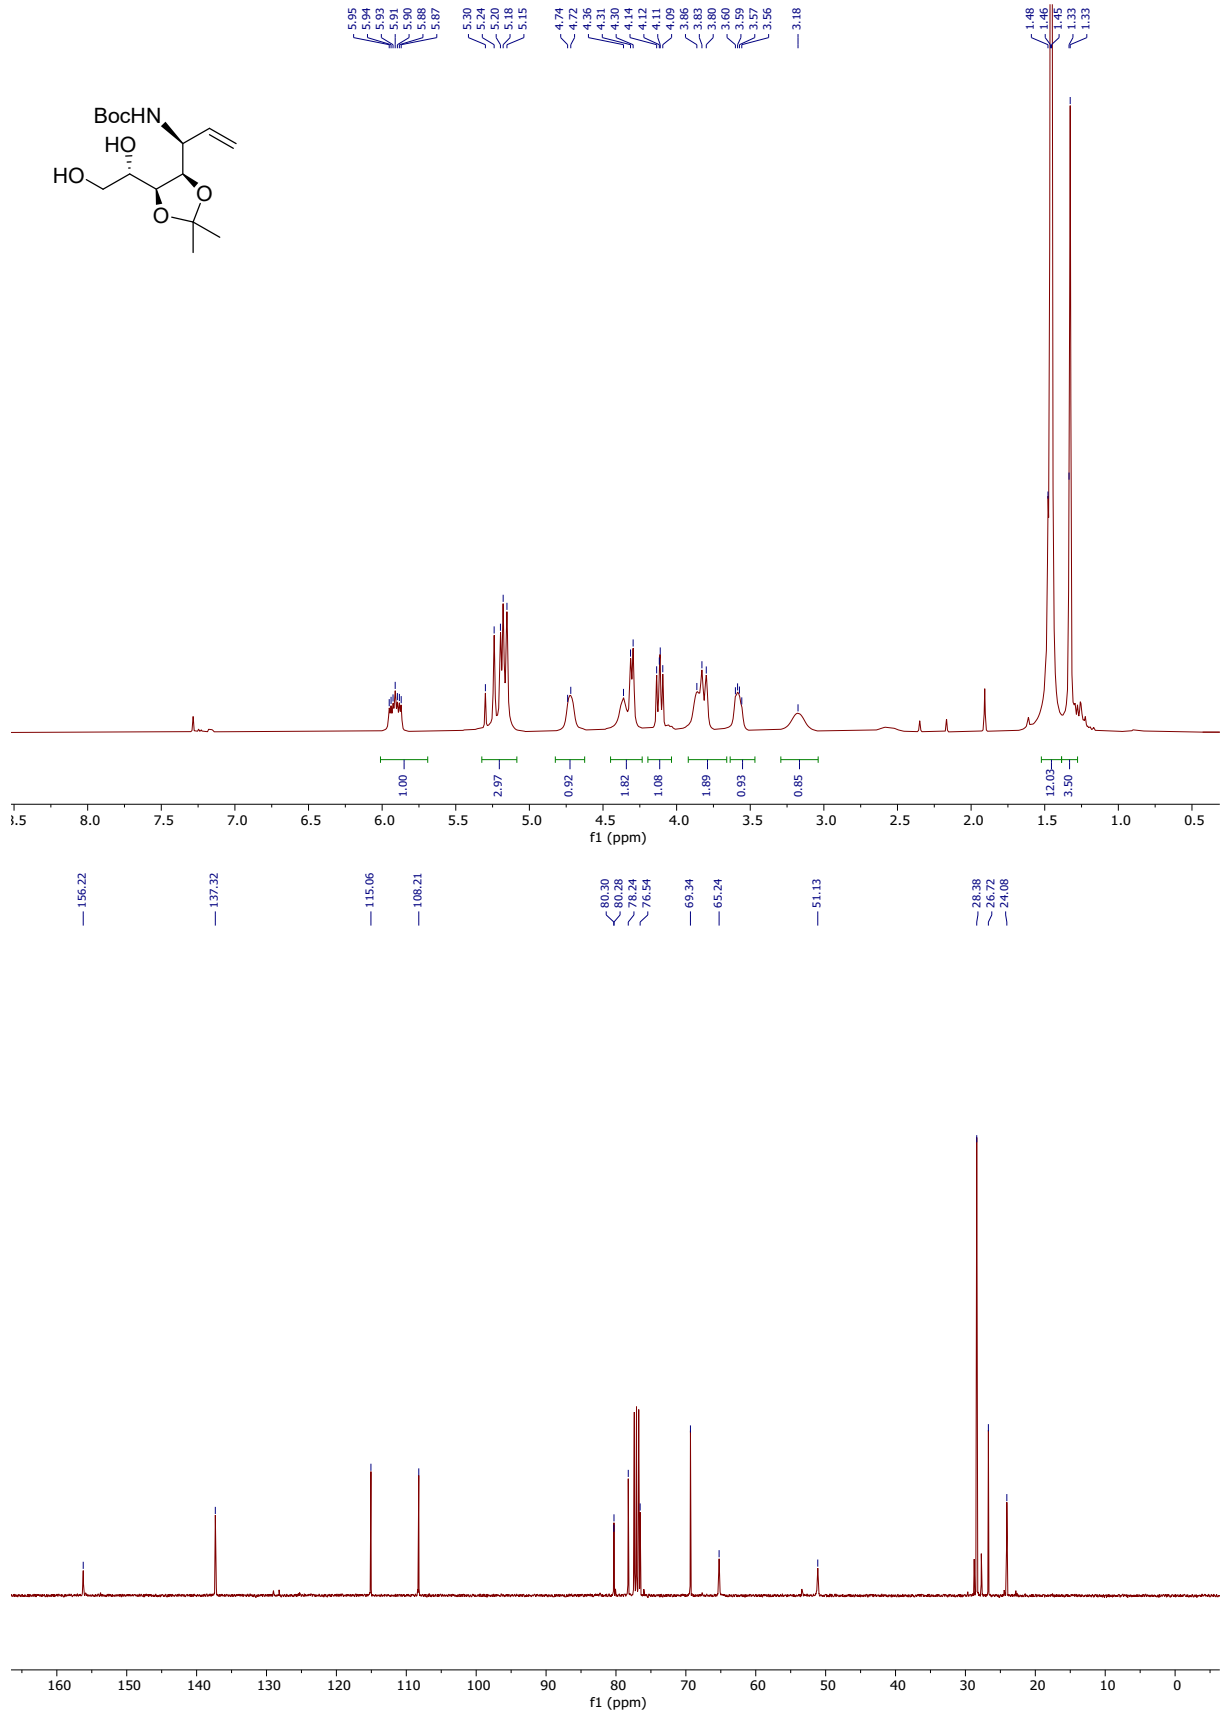

Compound 10

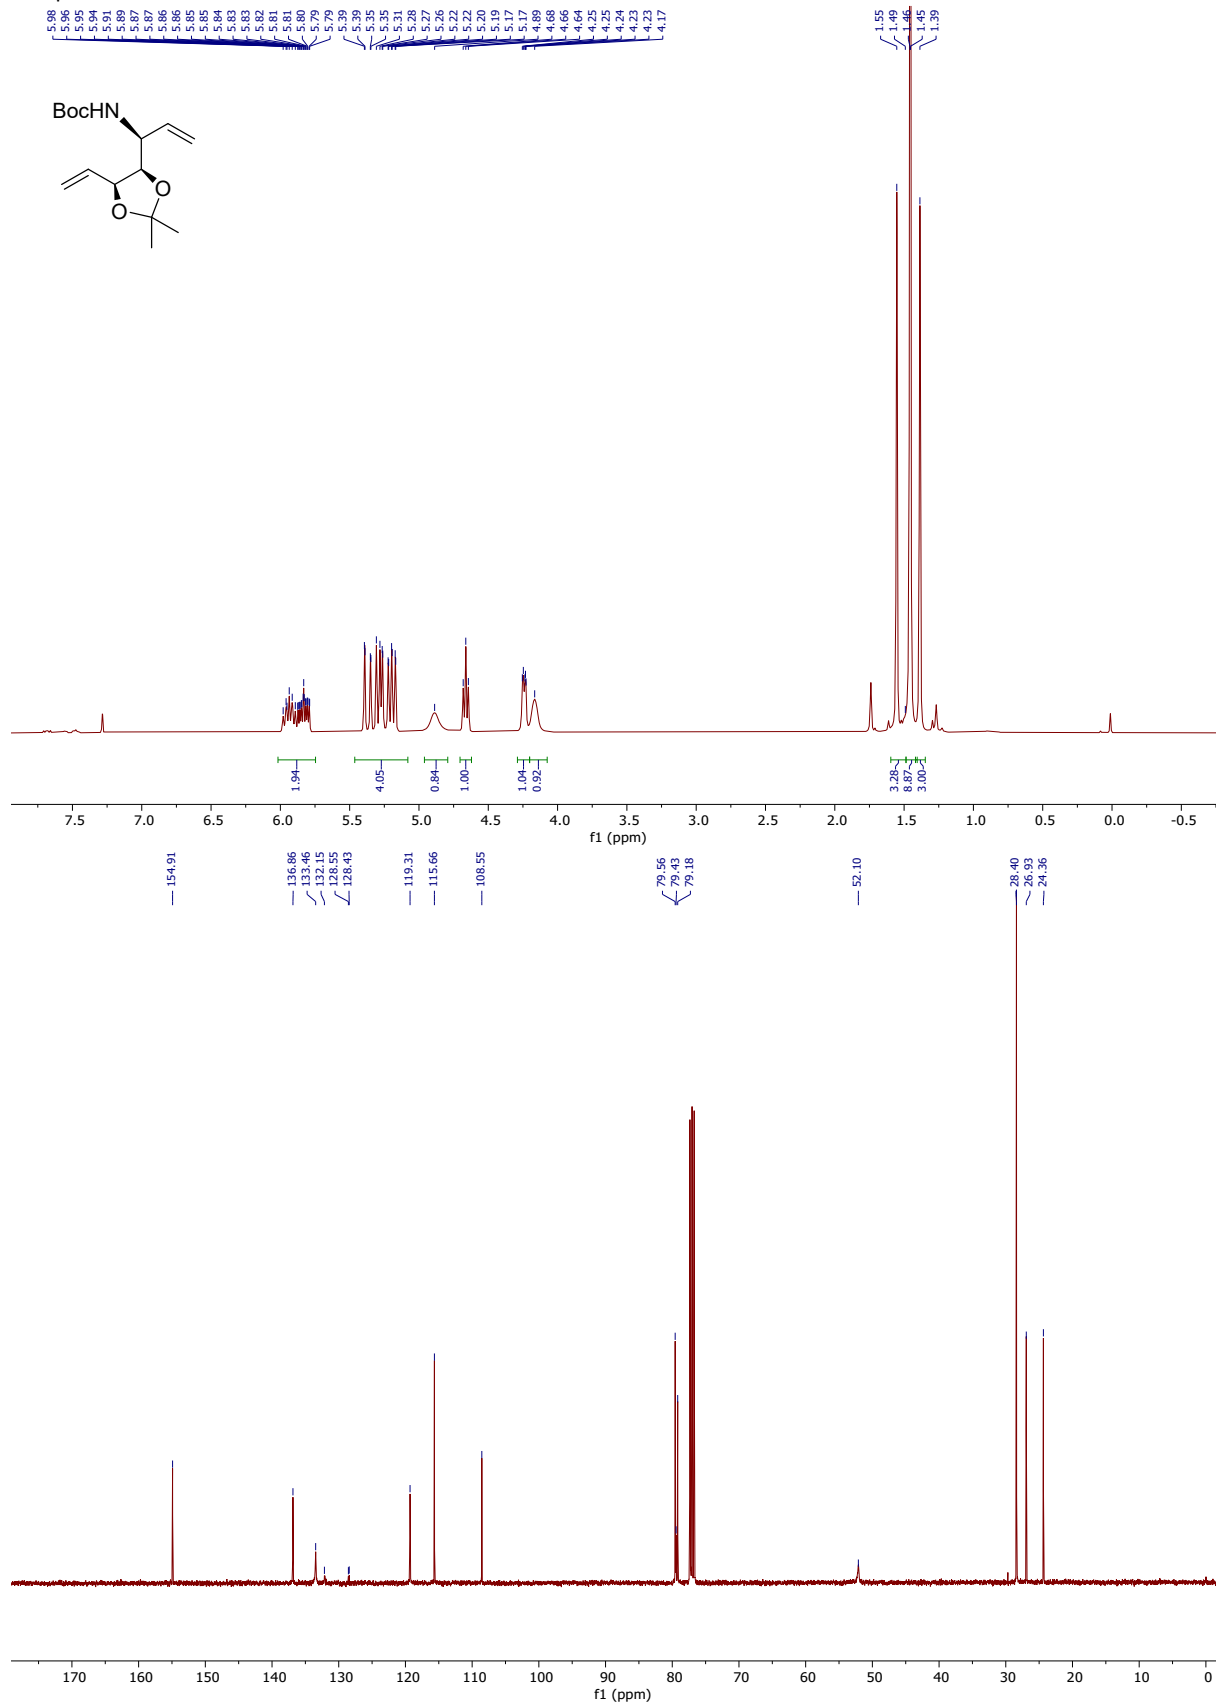



Compound 11

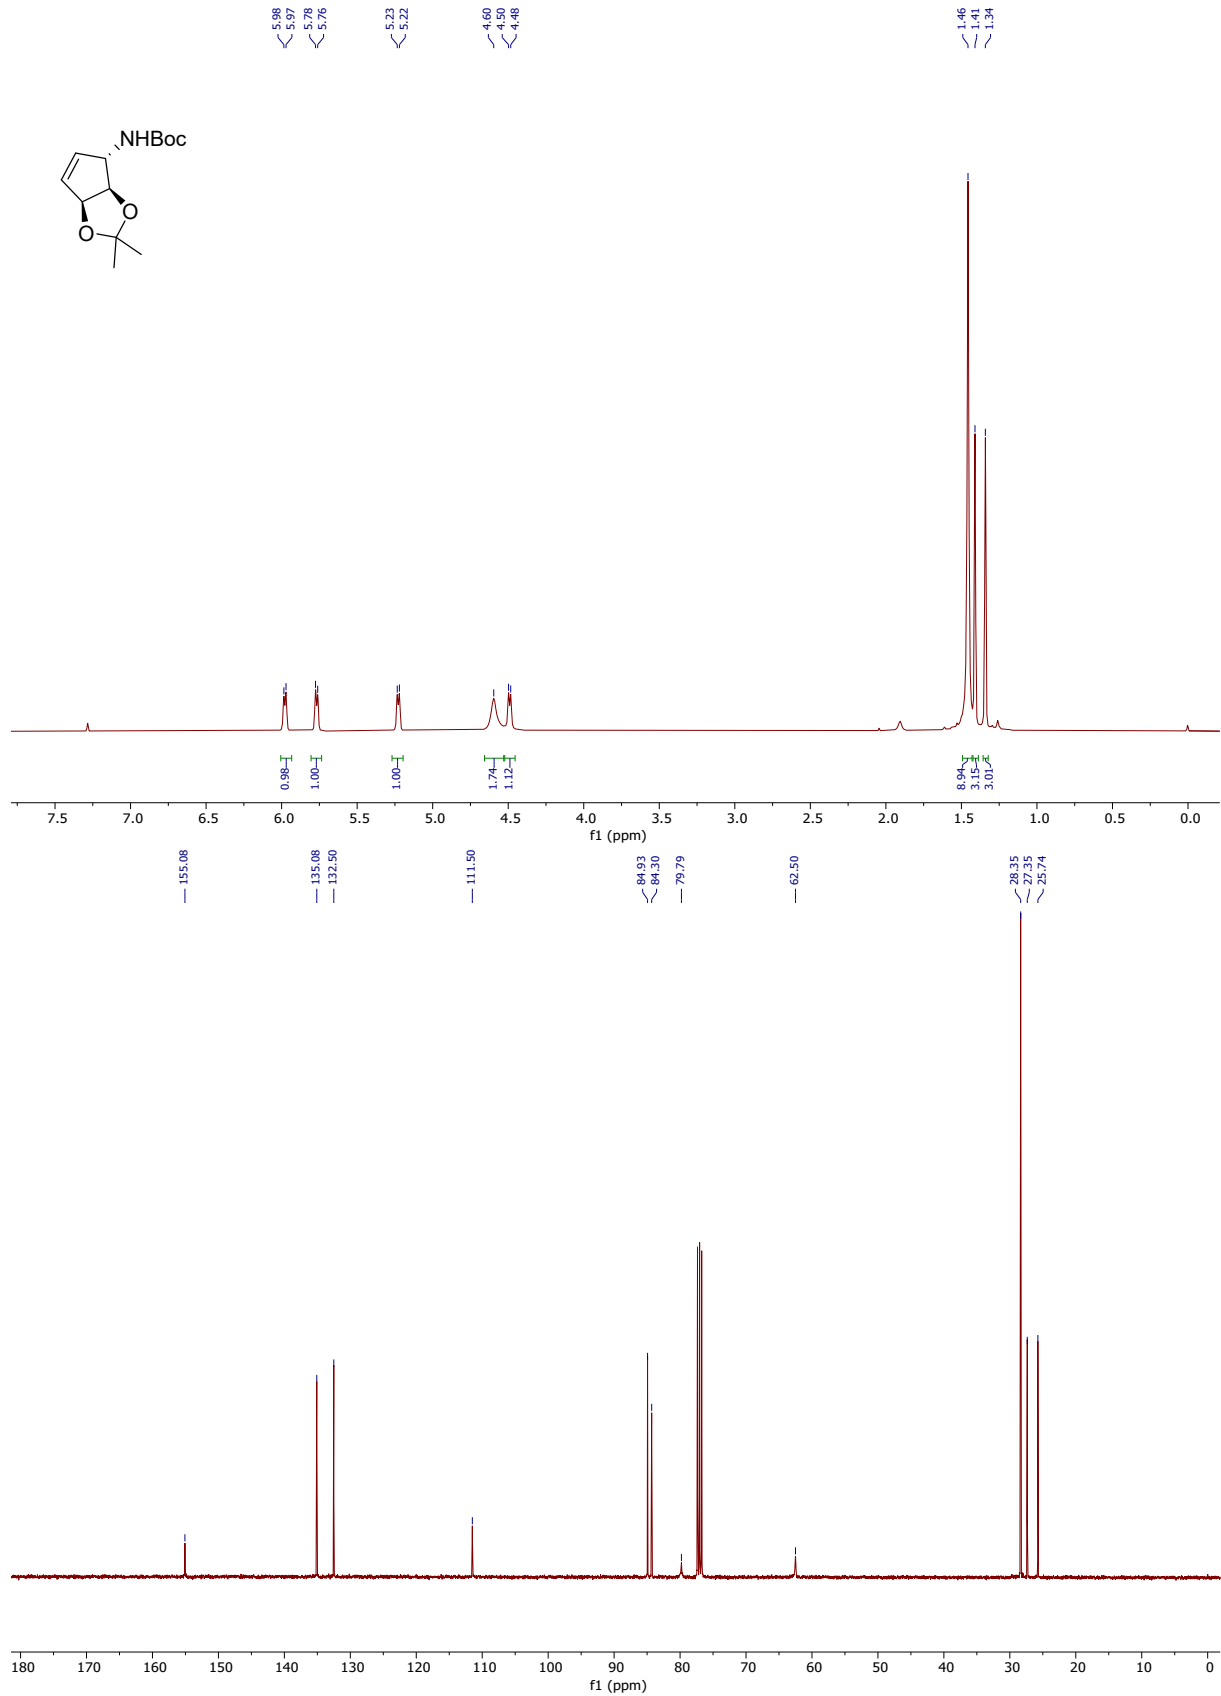

Compound 3

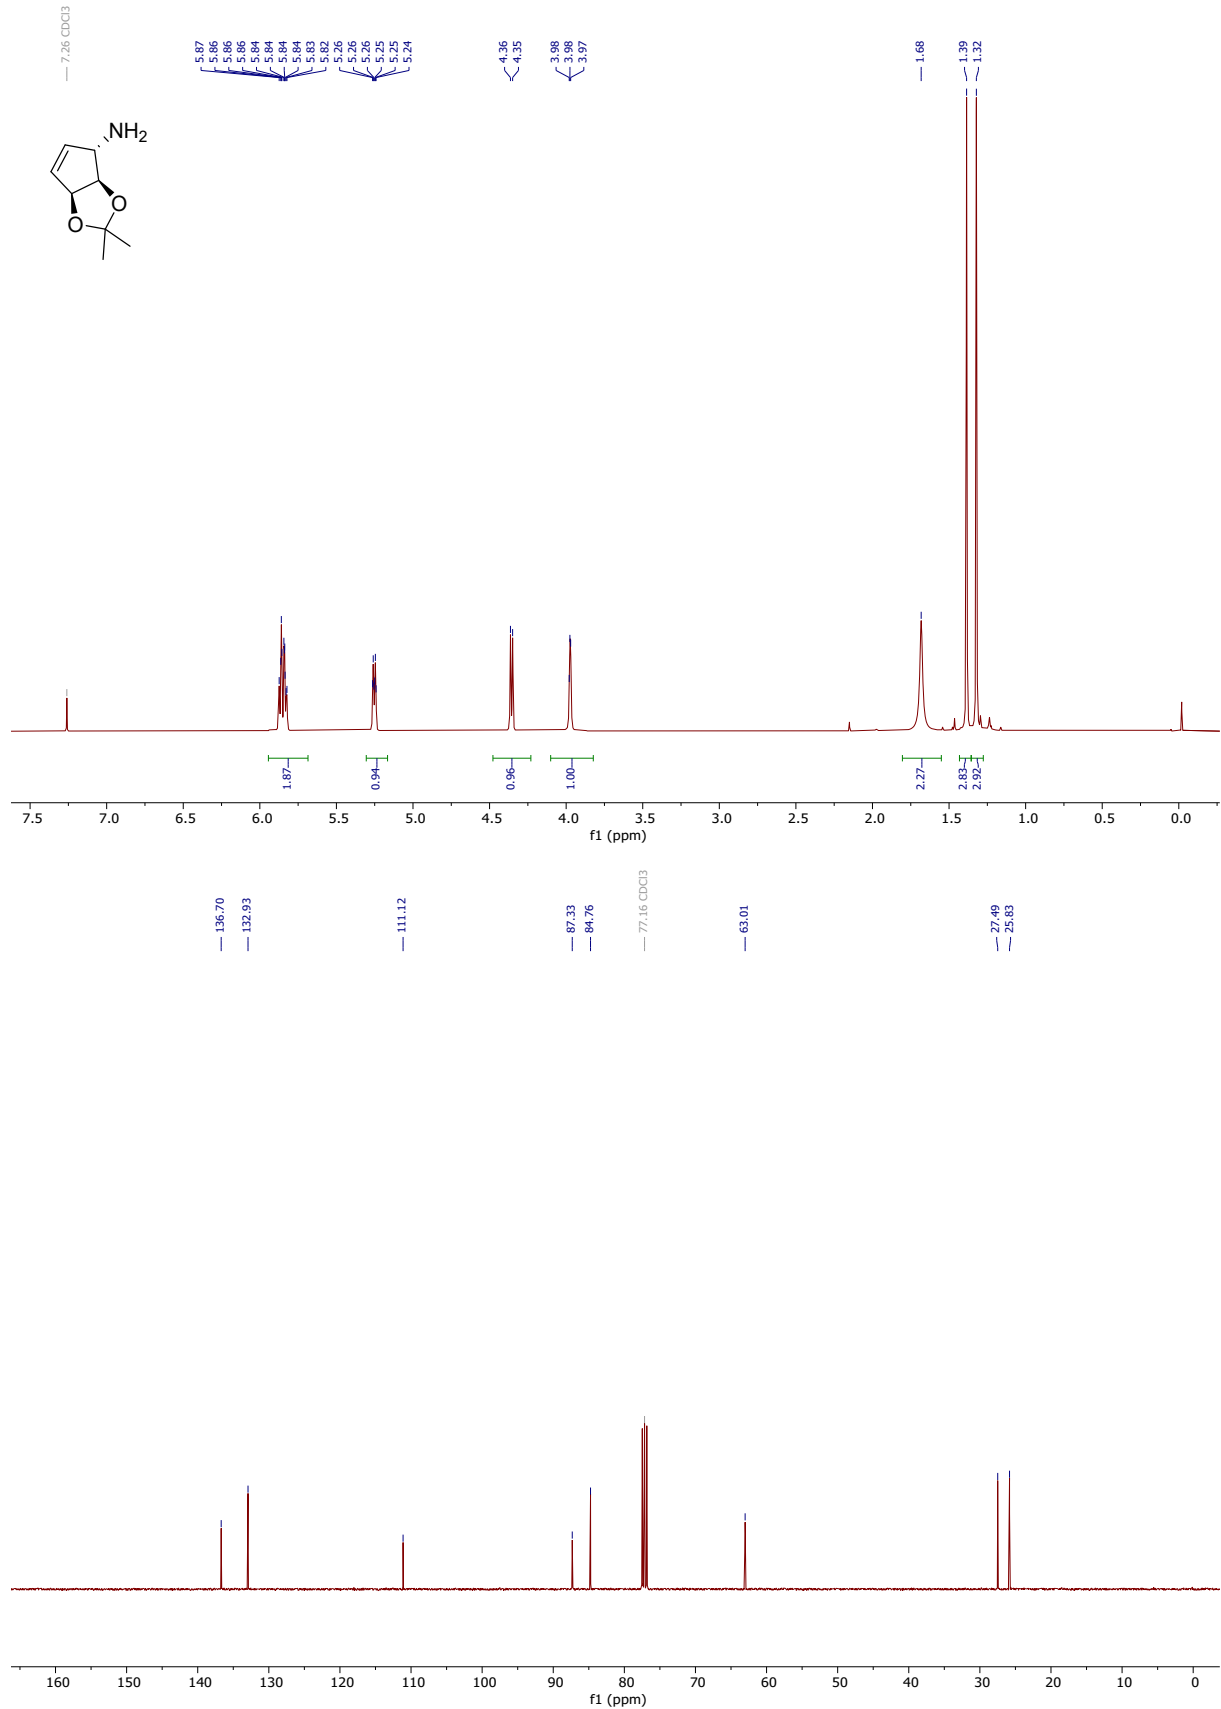

Supplement: d3ob01713c1.pdf [file d3ob01713c1.pdf]
